# Supplementary material
Source: PubMed Central journal article supplement (PMC7855828)

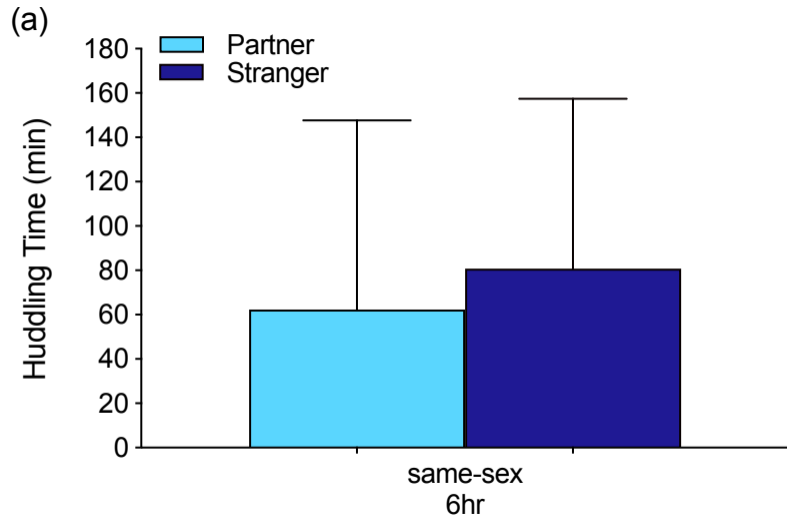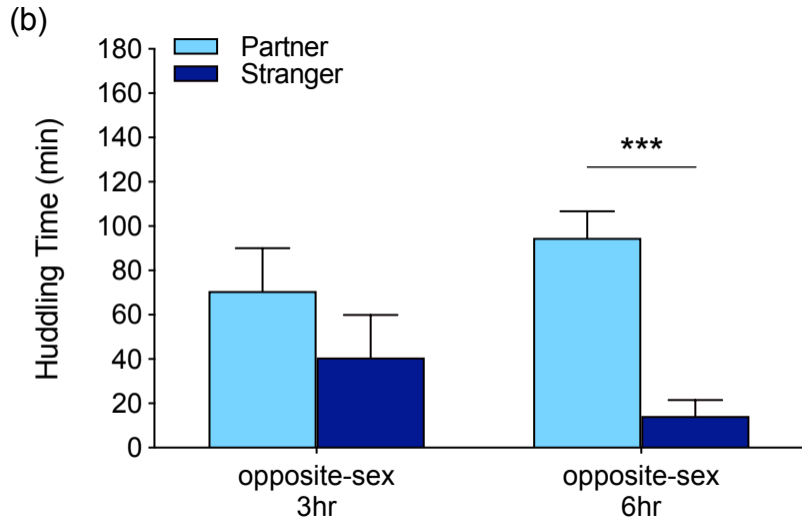

Supplement: NIHMS1644568-supplement-1.pdf [file NIHMS1644568-supplement-1.pdf]
